# Supplementary material for: Influence of framework disordering on the luminescence performance of Cr3+-doped near-infrared phosphors: a case study of A3B6O14-type hosts
Source: Royal Society of Chemistry journal article supplement (doi:10.1039/d3dt02631k), 2023-01-01
Supplement: d3dt02631k1.pdf [file d3dt02631k1.pdf]

**Influence of framework disordering on luminescence performance in Cr<sup>3+</sup>-doped near-infrared phosphor: a case study of A<sub>3</sub>B<sub>6</sub>O<sub>14</sub>-type hosts**

Jiahao Feng,<sup>a</sup> Shaojian Xu,<sup>a</sup> Ruijing Fu,<sup>a</sup> Yue Guo,<sup>a</sup> Qingguang Zeng,<sup>a</sup> Dawei Wen,<sup>\*a</sup>  
a. School of Applied Physics and Materials, Wuyi University, Jiangmen, 529020, PR  
China. E-mail: ontaii@163.com

## Synthesis, characterization and calculation

The  $\text{Ca}_{3-x}\text{Na}_x\text{Ga}_{2-x}\text{Ge}_{4+x}\text{O}_{14}:\text{Cr}^{3+}$  phosphors were synthesized by solid-state method. Stoichiometric raw materials of  $\text{Na}_2\text{CO}_3$ ,  $\text{CaCO}_3$ ,  $\text{Ga}_2\text{O}_3$ ,  $\text{GeO}_2$  and  $\text{Cr}_2\text{O}_3$  were mixed and ground in a mortar for 30 min. The mixtures were transferred to a furnace and heated for 4 h at 1100-1400 °C under an air atmosphere. The sintered materials were ground into powder for further characterization.

The detailed stoichiometries of  $\text{Ca}_{3-x}\text{Na}_x\text{Ga}_{2-x}\text{Ge}_{4+x}\text{O}_{14}$  and  $\text{Ca}_{3-x}\text{Na}_x\text{Ga}_{2-x}\text{Ge}_{4+x}\text{O}_{14}:\text{Cr}^{3+}$  are below.

For  $\text{Ca}_{3-x}\text{Na}_x\text{Ga}_{2-x}\text{Ge}_{4+x}\text{O}_{14}$ :

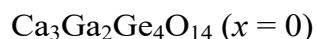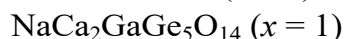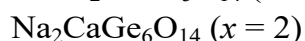

For  $\text{Ca}_{3-x}\text{Na}_x\text{Ga}_{2-x}\text{Ge}_{4+x}\text{O}_{14}:\text{Cr}^{3+}$ :

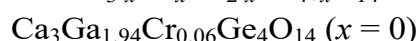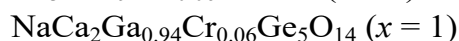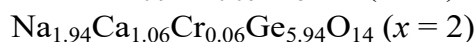

XRD were measured using a X'Pert powder diffractometer with Cu-K $\alpha$  radiation.

The Rietveld refinement was performed by the Z-Code software V1.1.3.<sup>S1, 2</sup> The PL, PL excitation (PLE) and temperature-dependent PL spectra were taken on an Edinburgh FLS980 fluorescence spectrophotometer with a 450W xenon lamp. QY of the phosphors were measured on a Hamamatsu UV-VIS absolute PL quantum yield spectrometer C13534 using 450 nm excitation. The diffuse reflectance spectra were taken on a Shimadzu UV-3600 plus UV-Visible-NIR spectrophotometer with white BaSO<sub>4</sub> powder as the standard reference.

DFT calculations were performed using the Vienna ab-initio Simulation Package (VASP) V6.2 and WIEN2K V21.1.<sup>S3, 4</sup> In total energies and structural optimization calculations, the exchange-correlation was described by revised Perdew-Burke-Ernzerhof functional for solid (PBEsol).<sup>S5</sup> The cut-off energy and convergence criterion were set to 500 eV and 10<sup>-8</sup> eV, respectively. The band structures and density of states were calculated using the modified Becke-Johnson (MBJ) potential method based on the optimized models by WIEN2K.<sup>S6,</sup>

<sup>7</sup> The Debye temperature  $\Theta_D$  was calculated based on the harmonic Debye model, relying on the bulk modulus and shears modulus:<sup>8</sup>

$$\Theta_D = \frac{h}{k_B} \left[ \frac{3n}{4\pi} \times \frac{N_A \rho}{M} \right]^{1/3} v_m \quad (\text{Eq. S1})$$

Where  $h$  is the Planck constant,  $k_B$  is the Boltzmann constant,  $n$  is the number of atoms in the formula,  $N_A$  is the Avogadro constant,  $\rho$  is density of the material,

$M$  is the molecular mass corresponding to  $n$  and  $v_m$  is calculated by the equations below:

$$v_m = \left[ \frac{1}{3} \left( \frac{2}{v_s^3} + \frac{1}{v_l^3} \right) \right]^{-1/3} \quad (\text{Eq. S2})$$

$$v_s = \left( \frac{G_H}{\rho} \right)^{1/2} \quad (\text{Eq. S3})$$

$$v_l = \left( \frac{B_H + \frac{4}{3}G_H}{\rho} \right)^{1/2} \quad (\text{Eq. S4})$$

Where  $B_H$  and  $G_H$  are bulk and shears modulus, respectively.

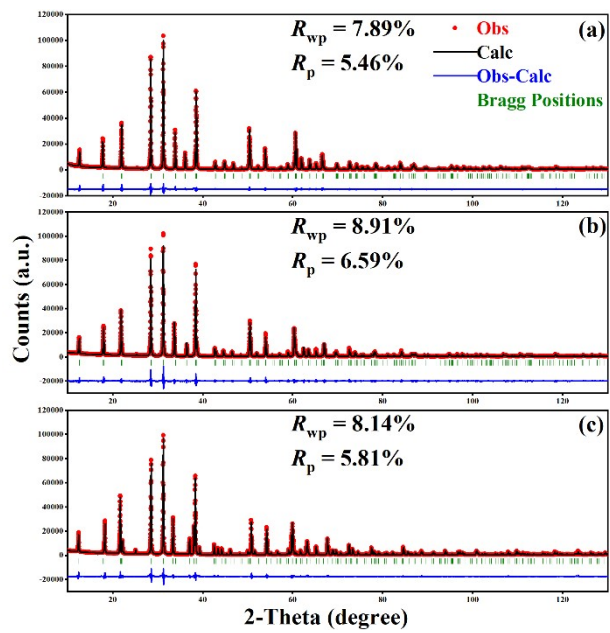

**Figure S1.** Rietveld refinement results of (a)  $\text{Ca}_3\text{Ga}_{1.94}\text{Cr}_{0.06}\text{Ge}_4\text{O}_{14}$ , (b)  $\text{NaCa}_2\text{Ga}_{0.94}\text{Cr}_{0.06}\text{Ge}_5\text{O}_{14}$  and  $\text{Na}_2\text{CaGe}_{5.94}\text{Cr}_{0.06}\text{O}_{14}$ .

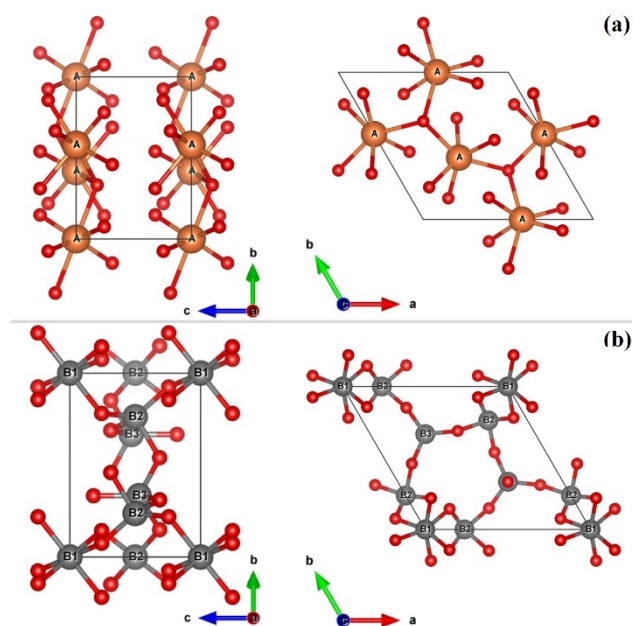

**Figure S2.** Crystal structure of  $A_3B_6O_{14}$ -type material showing (a) A cations and (b) B cations coordinated by  $O^{2-}$ .

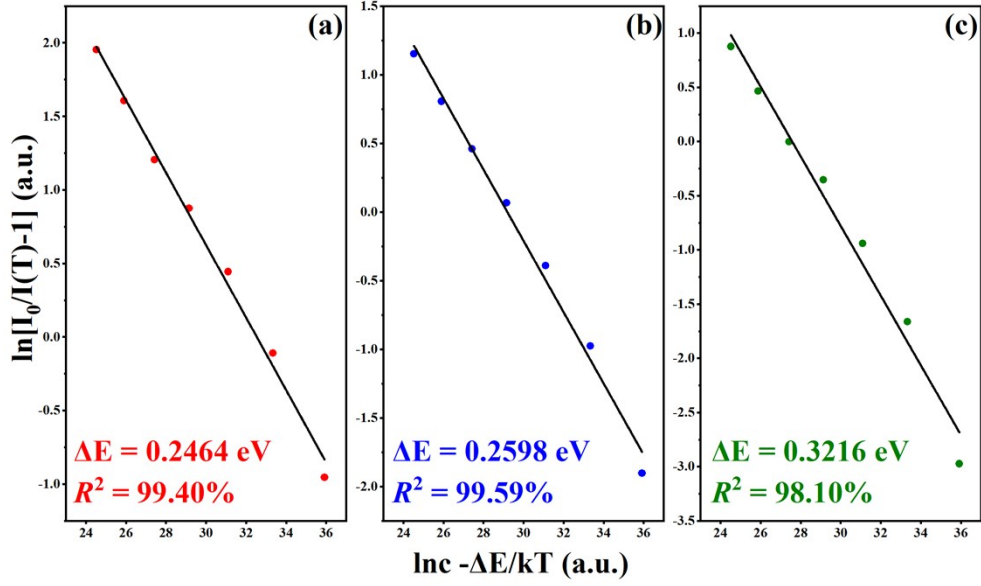

**Figure S3.** Arrhenius fitting of (a)  $\text{Ca}_3\text{Ga}_2\text{Ge}_4\text{O}_{14}:\text{Cr}^{3+}$ , (b)  $\text{NaCa}_2\text{GaGe}_5\text{O}_{14}:\text{Cr}^{3+}$  and (c)  $\text{Na}_2\text{CaGe}_5\text{O}_{14}:\text{Cr}^{3+}$ .

The activation energy  $\Delta E$  can be obtained by fitting the Arrhenius formula:<sup>9</sup>

$$I(T) = \frac{I_0}{1 + c \times e^{\left(-\frac{\Delta E}{kT}\right)}} \quad (\text{Eq. S5})$$

Where  $I_0$  and  $I(T)$  are the integral emission intensity at room temperature and testing temperature (25~200 °C), respectively.  $k$  is the Boltzmann constant ( $8.617 \times 10^{-5} \text{ eV/K}$ ) and  $c$  is the fitting constant.

The Eq. S1 was revised as:

$$\ln \left[ \frac{I_0}{I(T)} - 1 \right] = \ln c - \frac{\Delta E}{kT} \quad (\text{Eq. S6})$$

By linear fitting of  $\ln c - \frac{\Delta E}{kT}$  and  $\ln \left[ \frac{I_0}{I(T)} - 1 \right]$ , the slope ( $-\Delta E$ ) can be obtained.

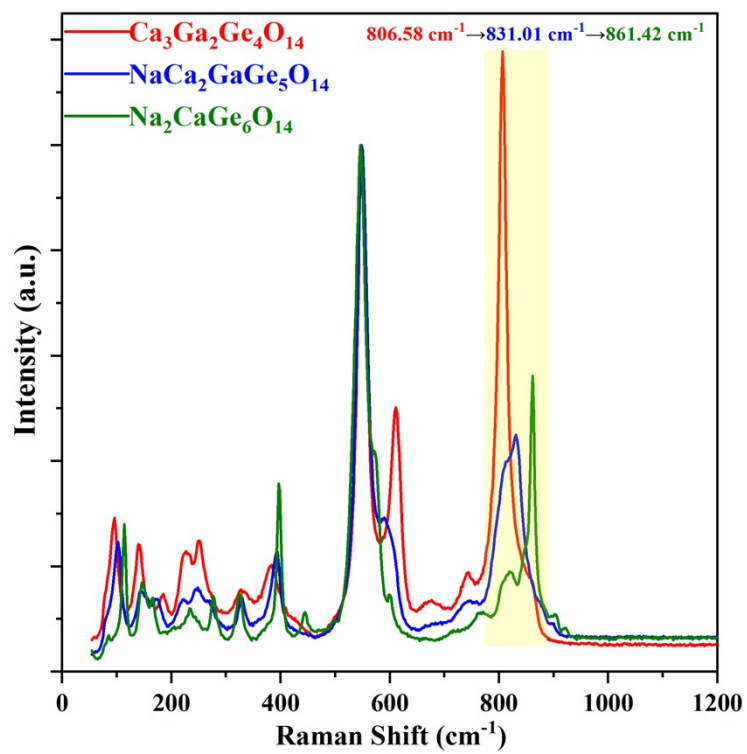

**Figure S4.** Raman spectra of  $\text{Ca}_3\text{Ga}_2\text{Ge}_4\text{O}_{14}$ ,  $\text{NaCa}_2\text{GaGe}_5\text{O}_{14}$  and  $\text{Na}_2\text{CaGe}_5\text{O}_{14}$  hosts.

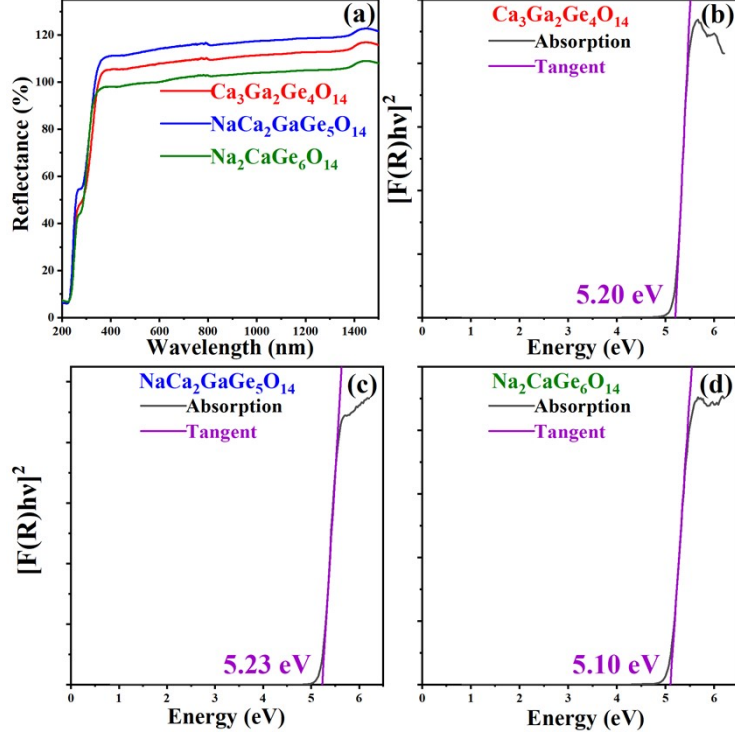

**Figure S5.** (a) Reflectance spectra of  $\text{Ca}_3\text{Ga}_2\text{Ge}_4\text{O}_{14}$ ,  $\text{NaCa}_2\text{GaGe}_5\text{O}_{14}$  and  $\text{Na}_2\text{CaGe}_6\text{O}_{14}$ , absorption spectra of (b)  $\text{Ca}_3\text{Ga}_2\text{Ge}_4\text{O}_{14}$ , (c)  $\text{NaCa}_2\text{GaGe}_5\text{O}_{14}$ , (d)  $\text{Na}_2\text{CaGe}_6\text{O}_{14}$ .

The absorption spectrum was calculated using the reflectance spectrum by the Kubelka–Munk function:

$$F(R) = \frac{(1 - R)^2}{2R} \quad (\text{Eq. S7})$$

$$[F(R)hv]^{\frac{1}{n}} = C_2(hv - E_g) \quad (\text{Eq. S8})$$

where  $R$  is the reflectance (%),  $hv$  is the photonic energy,  $n$  is 1/2 for direct bandgap and 2 for indirect bandgap materials,  $C_2$  is the absorption constant and  $E_g$  is the bandgap value.<sup>S10-12</sup> In our case,  $n$  is 1/2 based on the band structure calculation (Figure S4). The tangent fitting of the linear part was performed to obtain the  $E_g$  (intercept).



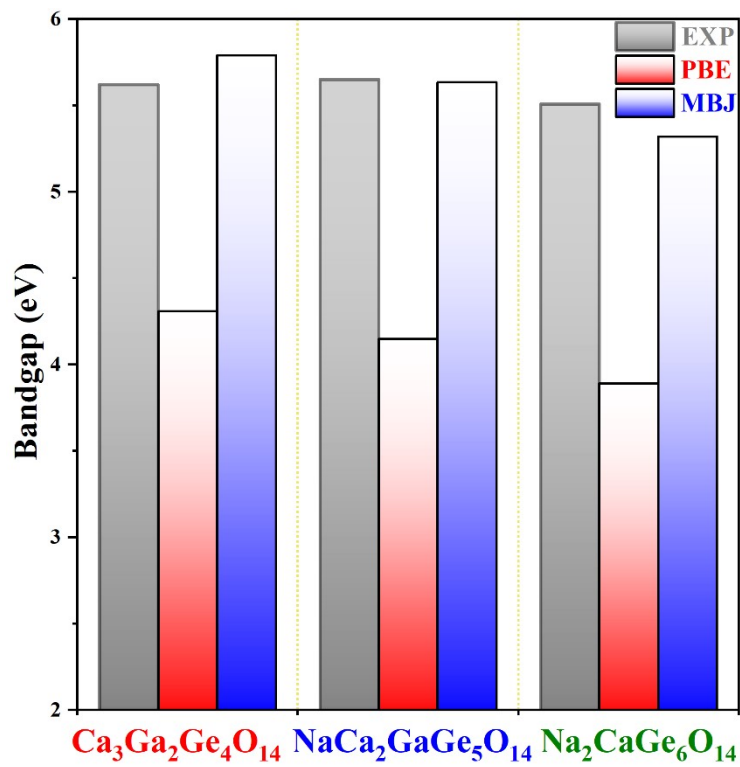

**Figure S6.** Bandgap values of  $\text{Ca}_3\text{Ga}_2\text{Ge}_4\text{O}_{14}$ ,  $\text{NaCa}_2\text{GaGe}_5\text{O}_{14}$  and  $\text{Na}_2\text{CaGe}_6\text{O}_{14}$ , by experimental method, PBE and MBJ calculation.

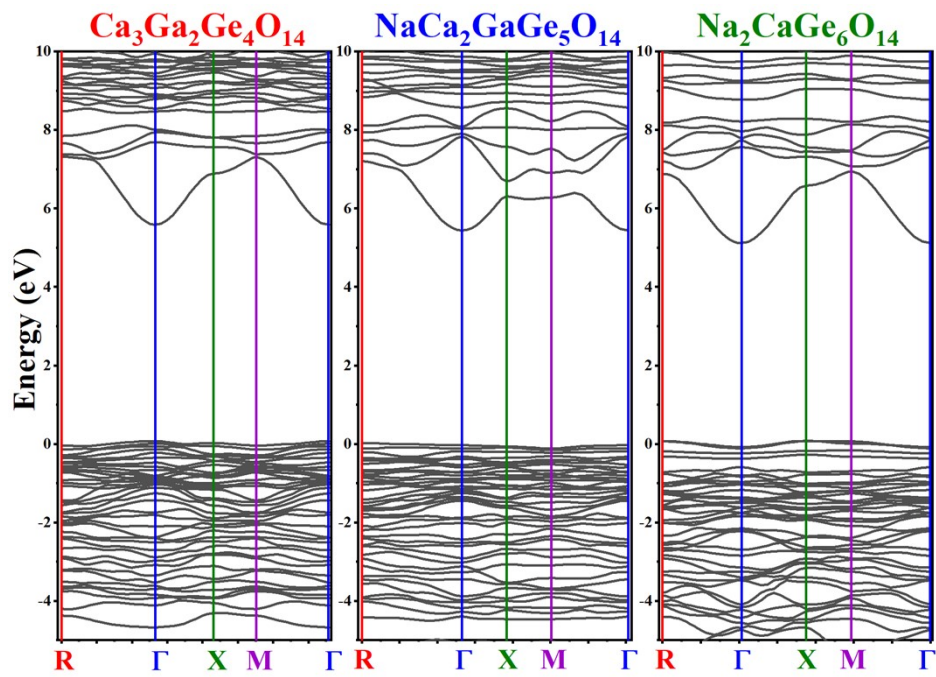

**Figure S7.** Band structures of  $\text{Ca}_3\text{Ga}_2\text{Ge}_4\text{O}_{14}$ ,  $\text{NaCa}_2\text{GaGe}_5\text{O}_{14}$  and  $\text{Na}_2\text{CaGe}_6\text{O}_{14}$ .

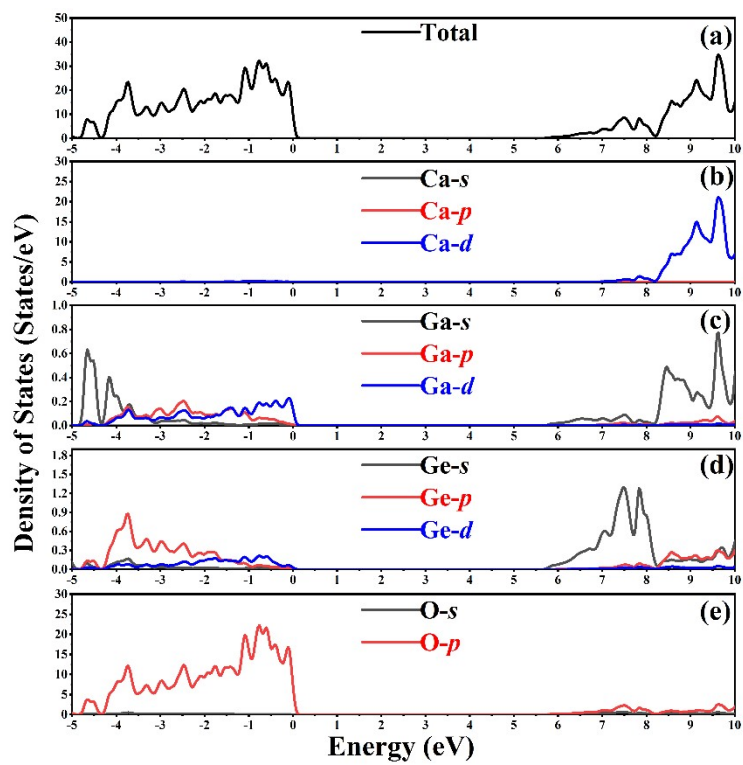

**Figure S8.** Density of state of (a)  $\text{Ca}_3\text{Ga}_2\text{Ge}_4\text{O}_{14}$  and the corresponding elements of (b) Ca, (c) Ga, (d) Ge, (e) O.

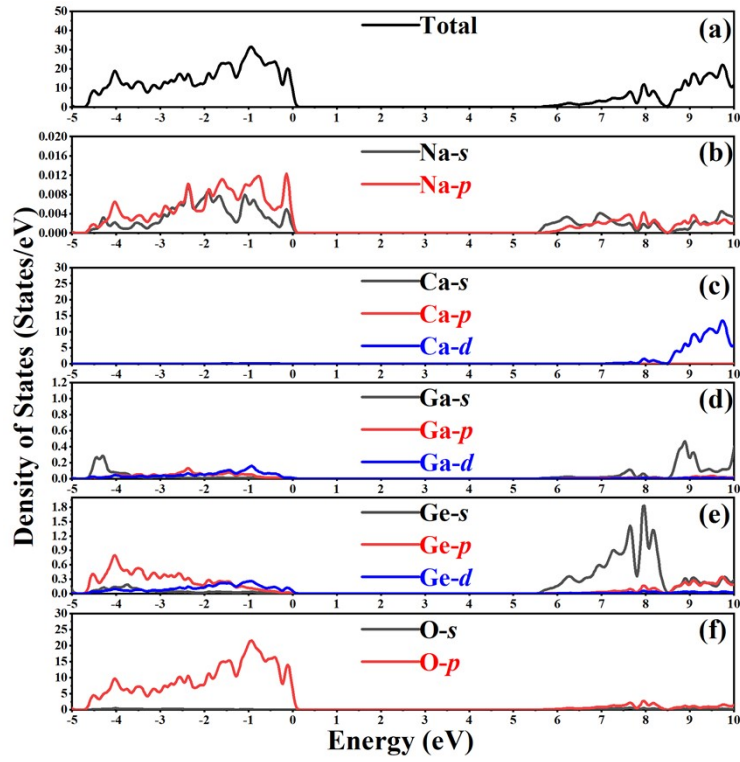

**Figure S9.** Density of state of (a)  $\text{NaCa}_2\text{GaGe}_5\text{O}_{14}$  and the corresponding elements of (b) Na, (c) Ca, (d) Ga, (e) Ge, (f) O.

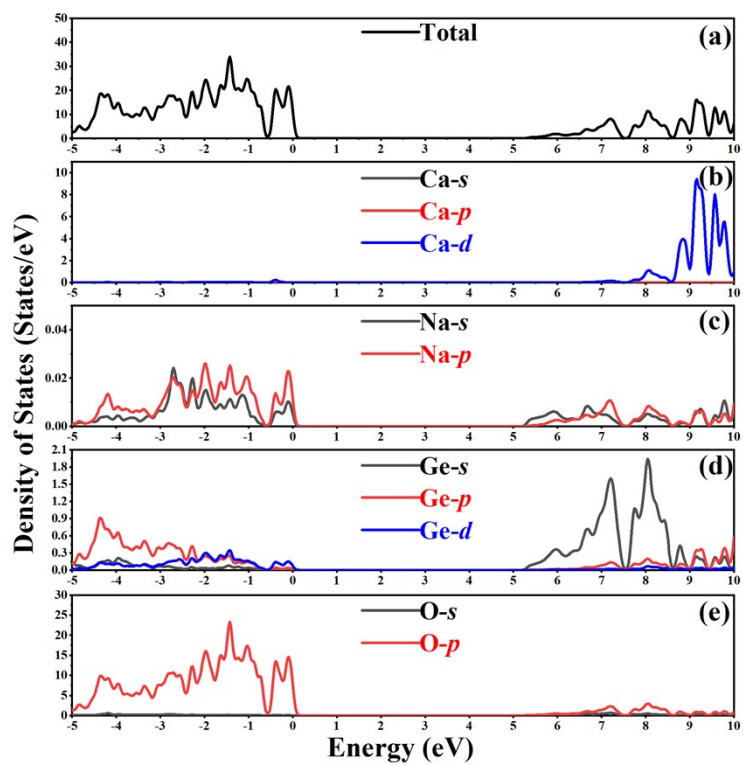

**Figure S10.** Density of state of (a)  $\text{Na}_2\text{CaGe}_6\text{O}_{14}$  and the corresponding elements of (b) Na, (c) Ca, (d) Ge, (e) O.

**Table S1.** Structural parameters of  $\text{Ca}_3\text{Ga}_{1.94}\text{Cr}_{0.06}\text{Ge}_4\text{O}_{14}$ .

| Space Group:     |       |                                   |               |                                |           |                            |                        |
|------------------|-------|-----------------------------------|---------------|--------------------------------|-----------|----------------------------|------------------------|
| $P321$ (NO. 150) |       | $a = b = 8.068249(9) \text{ \AA}$ |               | $c = 4.966600(10) \text{ \AA}$ |           | $V = 279.99 \text{ \AA}^3$ |                        |
| Wyckoff          |       |                                   |               |                                |           |                            |                        |
| Site             | Atom  | Position                          | Occupancy     | $x$                            | $y$       | $z$                        | $B$ ( $\text{\AA}^2$ ) |
| A                | Ca    | $3e$                              | 1             | 0.57986(15)                    | 0         | 0                          | 0.81(2)                |
| B1               | Ga/Ge | $1a$                              | 0.3333/0.6667 | 0                              | 0         | 0                          | 0.606(19)              |
| B2               | Ga/Ge | $3f$                              | 0.5/0.5       | 0.23714(6)                     | 0         | 0.5                        | 0.692(15)              |
| B3               | Ga/Ge | $2d$                              | 0.0833/0.9167 | 0.333333                       | 0.666667  | 0.5298(2)                  | 0.489(15)              |
| O1               | O     | $2d$                              | 1             | 0.333333                       | 0.666667  | 0.1811(8)                  | 0.64(6)                |
| O2               | O     | $6g$                              | 1             | 0.4596(6)                      | 0.1485(6) | 0.3134(6)                  | 1.52(6)                |
| O3               | O     | $6g$                              | 1             | 0.1438(5)                      | 0.2190(5) | 0.2433(7)                  | 1.24(6)                |

Due to the low concentration of  $\text{Cr}^{3+}$ , the related parameters were not refined.

**Table S2.** Structural parameters of  $\text{NaCa}_2\text{Ga}_{0.94}\text{Cr}_{0.06}\text{Ge}_5\text{O}_{14}$ .

| Space Group:     |       |                                    |               |                                |           |                            |                        |
|------------------|-------|------------------------------------|---------------|--------------------------------|-----------|----------------------------|------------------------|
| $P321$ (NO. 150) |       | $a = b = 8.109819(11) \text{ \AA}$ |               | $c = 4.919419(11) \text{ \AA}$ |           | $V = 280.20 \text{ \AA}^3$ |                        |
| Wyckoff          |       |                                    |               |                                |           |                            |                        |
| Site             | Atom  | Position                           | Occupancy     | $x$                            | $y$       | $z$                        | $B$ ( $\text{\AA}^2$ ) |
| A                | Na/Ca | $3e$                               | 0.3333/0.6667 | 0.58107(15)                    | 0         | 0                          | 0.95(3)                |
| B1               | Ge    | $1a$                               | 1             | 0                              | 0         | 0                          | 1.01(2)                |
| B2               | Ga/Ge | $3f$                               | 0.3333/0.6667 | 0.24143(6)                     | 0         | 0.5                        | 0.687(17)              |
| B3               | Ge    | $2d$                               | 1             | 0.333333                       | 0.666667  | 0.52553(18)                | 0.482(16)              |
| O1               | O     | $2d$                               | 1             | 0.333333                       | 0.666667  | 0.1826(6)                  | 0.36(6)                |
| O2               | O     | $6g$                               | 1             | 0.4609(4)                      | 0.1452(4) | 0.3215(4)                  | 0.48(5)                |
| O3               | O     | $6g$                               | 1             | 0.1467(4)                      | 0.2200(4) | 0.2278(6)                  | 1.17(6)                |

Due to the low concentration of  $\text{Cr}^{3+}$ , the related parameters were not refined.

**Table S3.** Structural parameters of  $\text{Na}_2\text{CaGe}_{5.94}\text{Cr}_{0.06}\text{O}_{14}$ .

| Space Group:     |       |                                  |               |                              |           |                            |                        |
|------------------|-------|----------------------------------|---------------|------------------------------|-----------|----------------------------|------------------------|
| $P321$ (NO. 150) |       | $a = b = 8.17478(3) \text{ \AA}$ |               | $c = 4.83834(2) \text{ \AA}$ |           | $V = 280.01 \text{ \AA}^3$ |                        |
| Wyckoff          |       |                                  |               |                              |           |                            |                        |
| Site             | Atom  | Position                         | Occupancy     | $x$                          | $y$       | $z$                        | $B$ ( $\text{\AA}^2$ ) |
| A                | Na/Ca | $3e$                             | 0.6667/0.3333 | 0.58399(14)                  | 0         | 0                          | 1.06(2)                |
| B1               | Ge    | $1a$                             | 1             | 0                            | 0         | 0                          | 0.572(12)              |
| B2               | Ge    | $3f$                             | 1             | 0.24739(4)                   | 0         | 0.5                        | 0.459(9)               |
| B3               | Ge    | $2d$                             | 1             | 0.333333                     | 0.666667  | 0.52035(18)                | 0.502(10)              |
| O1               | O     | $2d$                             | 1             | 0.333333                     | 0.666667  | 0.1812(7)                  | 0.87(3)                |
| O2               | O     | $6g$                             | 1             | 0.4556(4)                    | 0.1530(3) | 0.3126(4)                  | 0.80(3)                |
| O3               | O     | $6g$                             | 1             | 0.1207(4)                    | 0.2098(3) | 0.2293(4)                  | 0.87(3)                |

Due to the low concentration of  $\text{Cr}^{3+}$ , the related parameters were not refined.



## References:

1. R. Oishi, M. Yonemura, Y. Nishimaki, S. Torii, A. Hoshikawa, T. Ishigaki, T. Morishima, K. Mori and T. Kamiyama, *Nucl. Instrum. Methods Phys. Res., Sect. A*, 2009, **600**, 94-96.
2. R. Oishi Tomiyasu, M. Yonemura, T. Morishima, A. Hoshikawa, S. Torii, T. Ishigaki and T. Kamiyama, *J. Appl. Crystallogr.*, 2012, **45**, 299-308.
3. G. Kresse and J. Furthmüller, *Comput. Mater. Sci.*, 1996, **6**, 15-50.
4. P. Blaha, K. Schwarz, F. Tran, R. Laskowski, G. K. H. Madsen and L. D. Marks, *J. Chem. Phys.*, 2020, **152**, 074101.
5. J. P. Perdew, A. Ruzsinszky, G. I. Csonka, O. A. Vydrov, G. E. Scuseria, L. A. Constantin, X. Zhou and K. Burke, *Phys. Rev. Lett.*, 2008, **100**, 136406.
6. A. D. Becke and E. R. Johnson, *J. Chem. Phys.*, 2006, **124**, 221101.
7. F. Tran and P. Blaha, *Phys. Rev. Lett.*, 2009, **102**, 226401.
8. O. L. Anderson, *J. Phys. Chem. Solids*, 1963, **24**, 909-917.
9. J. Ueda, T. Minowa, J. Xu, S. Tanaka, T. Nakanishi, T. Takeda and S. Tanabe, *ACS Appl. Opt. Mater.*, 2023, **1**, 1128-1137.
10. Y. Wei, Z. Gao, S. Liu, S. Chen, G. Xing, W. Wang, P. Dang, A. A. Al Kheraif, G. Li and J. Lin, *Adv. Opt. Mater.*, 2020, **8**, 1901859.
11. H. Liu, H. Liang, W. Zhang, Q. Zeng and D. Wen, *Chem. Eng. J.*, 2021, **410**, 128367.
12. D. Wen, H. Liu, Y. Guo, Q. Zeng, M. Wu and R. S. Liu, *Angew. Chem. Int. Ed.*, 2022, **61**, e202204411.
